# Supplementary material for: Comparative Study of the Steroidogenic Effects of Human Chorionic Gonadotropin and Thieno[2,3-D]pyrimidine-Based Allosteric Agonist of Luteinizing Hormone Receptor in Young Adult, Aging and Diabetic Male Rats
Source: MDPI journal article supplement (doi:10.3390/ijms21207493), 2020-10-11
Supplement: s1 [file s1]

| Genes          | Forward/Reverse sequence     | Product size (bp) | Annealing temperature (°C) | Genbank        |
|----------------|------------------------------|-------------------|----------------------------|----------------|
| <i>Lhr</i>     | (For) CTGCGCTGTCCTGGCC       | 103               | 55                         | NM_012978.1    |
|                | (Rev) CGACCTCATTAAGTCCCCTGAA |                   |                            |                |
| <i>Star</i>    | (For) AAGGCTGGAAGAAGGAAAGC   | 66                | 55                         | NM_031558.3    |
|                | (Rev) CACCTGGCACCACCTTACTT   |                   |                            |                |
| <i>Cyp11a1</i> | (For) TATTCCGCTTTGCCTTTGAG   | 74                | 55                         | NM_017286.3    |
|                | (Rev) CACGATCTCCTCCAACATCC   |                   |                            |                |
| <i>Hsd3B</i>   | (For) AGGCCTGTGTCCAAGCTAGTGT | 161               | 55                         | XM_017591325.1 |
|                | (Rev) CTCGGCCATCTTTTTGCTGTAT |                   |                            |                |
| <i>Cyp17a1</i> | (For) CATCCCCACAAGGCTAAC     | 61                | 55                         | XM_006231435.3 |
|                | (Rev) TGTGTCCTTGGGGACAGTAAA  |                   |                            |                |
| <i>Hsd17B</i>  | (For) CCTTTGGCTTTGCCATGAGA   | 68                | 55                         | NM_024392.2    |
|                | (Rev) CAATCCATCCTGCTCCAACCT  |                   |                            |                |
| <i>Actb</i>    | (For) CTGGCACCACACCTTCTACA   | 125               | 55                         | NM_031144.3    |
|                | (Rev) AGGTCTCAAACATGATCTGGGT |                   |                            |                |
