# Supplementary material for: Comparative Study of the Steroidogenic Effects of Human Chorionic Gonadotropin and Thieno[2,3-D]pyrimidine-Based Allosteric Agonist of Luteinizing Hormone Receptor in Young Adult, Aging and Diabetic Male Rats
Source: MDPI journal article supplement (doi:10.3390/ijms21207493), 2020-10-11
Supplement: s1 [file s1]

|                   | 10-00      | 12-30                    | 14-00                    | AUC <sub>10.00-14.00</sub> |
|-------------------|------------|--------------------------|--------------------------|----------------------------|
| <b>A (fT4)</b>    |            |                          |                          |                            |
| Control           | 18.7 ± 0.7 | 19.9 ± 1.0               | 18.1 ± 0.8               | 76.6 ± 3.1                 |
| Control+TP4/2     | 19.5 ± 0.9 | 20.2 ± 1.5               | 18.6 ± 1.3               | 78.7 ± 3.8                 |
| Control+TRH       | 20.4 ± 1.3 | 27.9 ± 1.3 <sup>a</sup>  | 32.9 ± 1.7 <sup>a</sup>  | 106.0 ± 3.5 <sup>b</sup>   |
| Control+TP4/2+TRH | 19.1 ± 0.8 | 27.6 ± 1.3 <sup>a</sup>  | 31.7 ± 1.6 <sup>a</sup>  | 102.9 ± 3.6 <sup>b</sup>   |
| <b>B (tT4)</b>    |            |                          |                          |                            |
| Control           | 95.1 ± 2.5 | 96.2 ± 2.1               | 92.3 ± 2.1               | 380.6 ± 7.8                |
| Control+TP4/2     | 94.5 ± 3.0 | 97.2 ± 3.5               | 94.3 ± 3.1               | 383.1 ± 9.5                |
| Control+TRH       | 93.0 ± 4.3 | 108.3 ± 3.4 <sup>a</sup> | 121.2 ± 3.9 <sup>a</sup> | 423.8 ± 10.0 <sup>b</sup>  |
| Control+TP4/2+TRH | 93.2 ± 2.4 | 106.8 ± 2.5 <sup>a</sup> | 122.3 ± 4.8 <sup>a</sup> | 421.7 ± 7.6 <sup>b</sup>   |
| <b>C (tT3)</b>    |            |                          |                          |                            |
| Control           | 2.6 ± 0.1  | 2.5 ± 0.1                | 2.3 ± 0.2                | 10.00 ± 0.38               |
| Control+TP4/2     | 2.6 ± 0.1  | 2.5 ± 0.2                | 2.4 ± 0.2                | 9.97 ± 0.41                |
| Control+TRH       | 2.5 ± 0.1  | 2.9 ± 0.1                | 3.9 ± 0.3                | 11.80 ± 0.17 <sup>b</sup>  |
| Control+TP4/2+TRH | 2.5 ± 0.2  | 2.8 ± 0.2 <sup>a</sup>   | 3.8 ± 0.3 <sup>a</sup>   | 11.64 ± 0.57               |

*Note.* TP4/2 was administered into male rats (i.p., 20 mg/kg, in 200 µL of DMSO), and the control group was injected with DMSO (i.p., 200 µL), a solvent for TP4/2. Thyrotropin-releasing hormone (TRH) (“Sigma-Aldrich”, USA) was administered intranasally (300 µg/kg, in 20 µL of saline). The first blood sampling was obtained at 10.00. At 10.30 the groups Control+TP4/2 and Control+TP4/2+TRH were injected with TP4/2, and the groups Control and Control+TRH were treated with DMSO. At 11.00 the groups Control+TRH and Control+TP4/2+TRH were treated with intranasally administered TRH, and the groups Control and Control+TP4/2 were treated with intranasally administered saline instead of TRH. At 12.30 and 14.00 the second and third blood samples were obtained ( $n=5$  in each group). The blood samples were obtained from the tail vein using a local anesthesia (2% lidocaine solution, 2–4 mg/kg). The blood levels of free (fT4) and total (tT4) thyroxine and total triiodothyronine (tT3) were determined using the ELISA kits obtained from “Immunotech” (Russia). <sup>a</sup> - the difference between the levels of thyroid hormones at 10.00 and their levels at 12.30 and 14.00 is significant at  $p < 0.05$ ; <sup>b</sup> - the difference between the control and TRH-treated rats is significant at  $p < 0.05$ . The data are presented as the  $M \pm SEM$ ,  $n=5$ .
