# Supplementary material for: Comparative Study of the Steroidogenic Effects of Human Chorionic Gonadotropin and Thieno[2,3-D]pyrimidine-Based Allosteric Agonist of Luteinizing Hormone Receptor in Young Adult, Aging and Diabetic Male Rats
Source: MDPI journal article supplement (doi:10.3390/ijms21207493), 2020-10-11
Supplement: s1 [file s1]

| Group of rats                                                                   | Basal            | Forskolin, $10^{-5}$ M | GppNHp, $10^{-5}$ M    |
|---------------------------------------------------------------------------------|------------------|------------------------|------------------------|
| Adenylyl cyclase activity, pmol cAMP/min/mg of membrane protein,<br>$M \pm SEM$ |                  |                        |                        |
| Young                                                                           | $26.1 \pm 1.1$   | $267.5 \pm 3.9$        | $159.2 \pm 3.5$        |
| Aging                                                                           | $22.8 \pm 1.2^b$ | $254.2 \pm 7.0^b$      | $133.4 \pm 6.9^{a, b}$ |
| Diab                                                                            | $18.5 \pm 0.9^a$ | $197.9 \pm 5.3^a$      | $92.2 \pm 6.1^a$       |

Notes. <sup>a</sup> - the difference between the young rats and the aging or diabetic rats is significant at  $p < 0.05$ ; <sup>b</sup> - the difference between the aging and diabetic rats is significant at  $p < 0.05$ . The data are presented as the  $M \pm SEM$ ,  $n=5$ .
