# Supplementary material for: Comparative Study of the Steroidogenic Effects of Human Chorionic Gonadotropin and Thieno[2,3-D]pyrimidine-Based Allosteric Agonist of Luteinizing Hormone Receptor in Young Adult, Aging and Diabetic Male Rats
Source: MDPI journal article supplement (doi:10.3390/ijms21207493), 2020-10-11
Supplement: s1 [file s1]

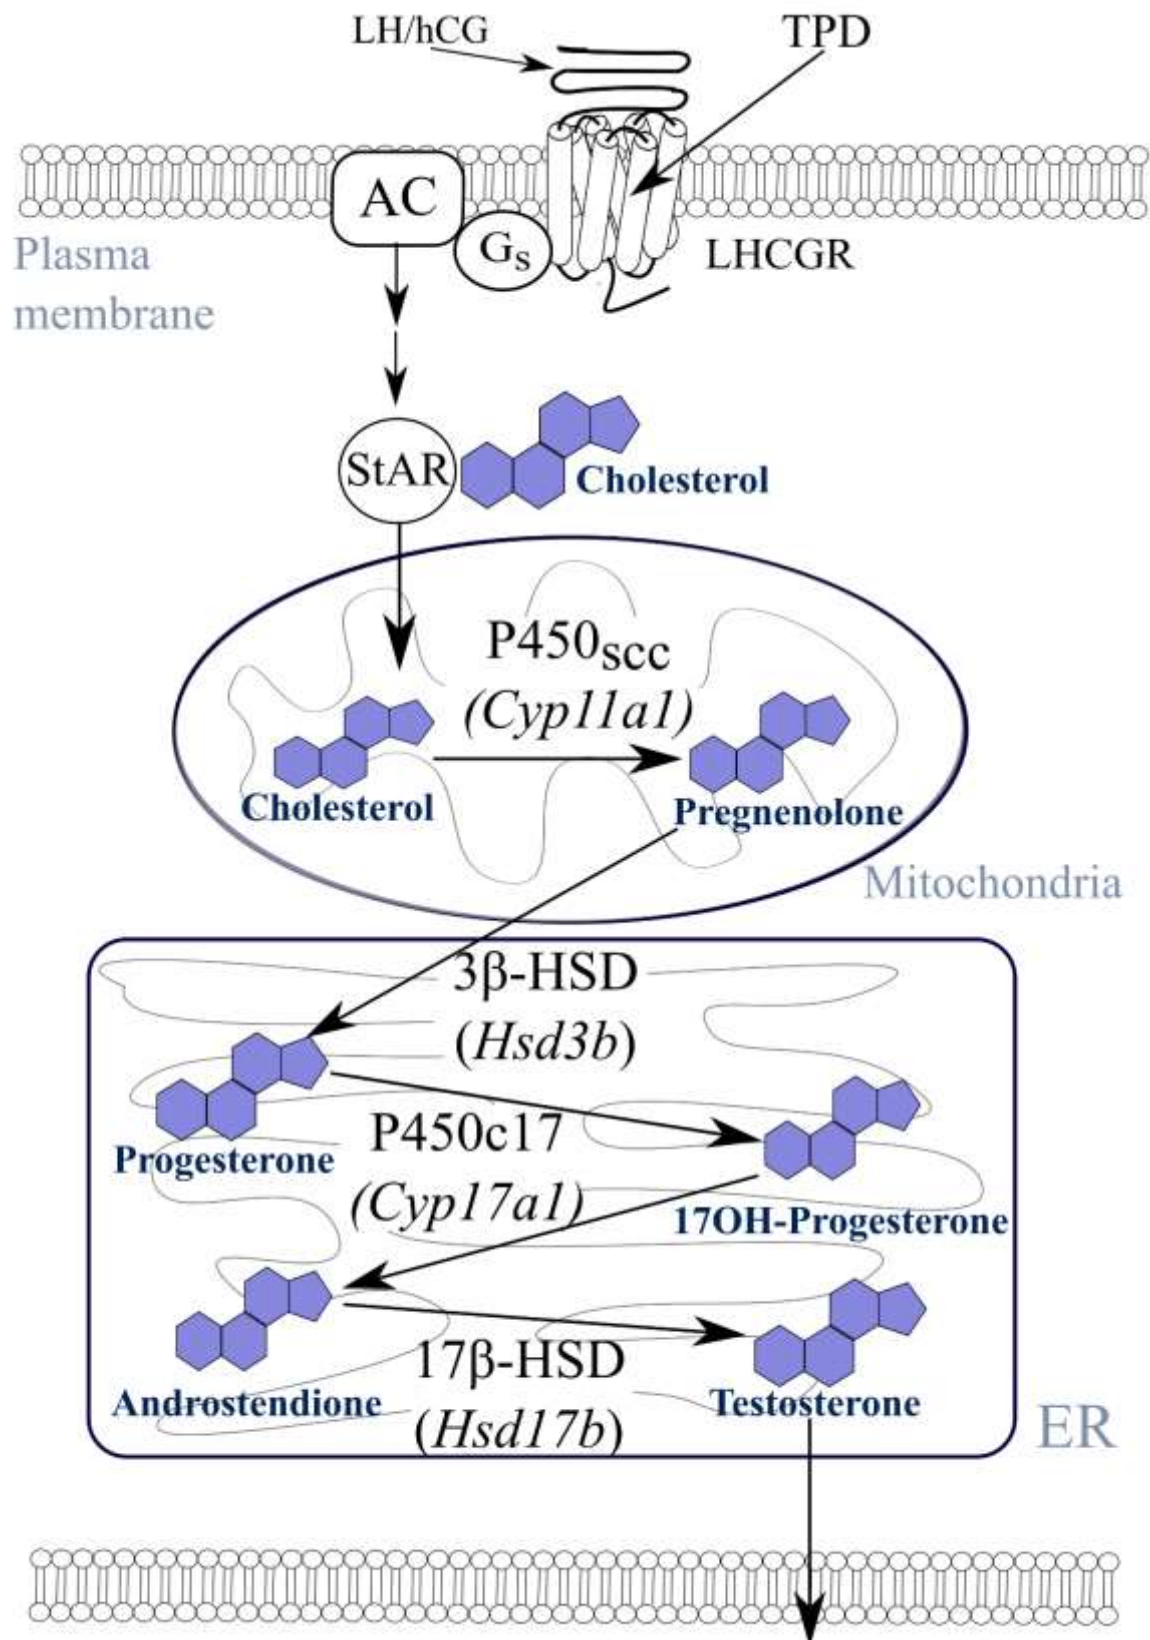

*Abbreviations:* LH – luteinizing hormone; hCG – human chorionic gonadotropin; TPD – thieno[2,3-d]pyrimidine derivative; LHCGR – LH/hCG receptor; G<sub>s</sub> – heterotrimeric G<sub>s</sub> protein; AC – adenylyl cyclase; StAR – steroidogenic acute regulatory protein; P450<sub>scc</sub> – cytochrome 450, cholesterol side-chain cleavage enzyme (CYP11A1); 3β-HSD – 3β-hydroxysteroid dehydrogenase/Δ<sup>5-4</sup> isomerase; P450c17 – cytochrome P450 17A1/steroid 17α-monooxygenase (CYP17A1); 17β-HSD – 17β-hydroxysteroid dehydrogenase; 17OH-progesterone – 17-hydroxyprogesterone.
