# Supplementary material for: Comparative Study of the Steroidogenic Effects of Human Chorionic Gonadotropin and Thieno[2,3-D]pyrimidine-Based Allosteric Agonist of Luteinizing Hormone Receptor in Young Adult, Aging and Diabetic Male Rats
Source: MDPI journal article supplement (doi:10.3390/ijms21207493), 2020-10-11
Supplement: s1 [file s1]

|                      | Basal                                                                                | Forskolin, $10^{-5}$ M | GppNHp, $10^{-5}$ M | TSH, $10^{-9}$ M  |
|----------------------|--------------------------------------------------------------------------------------|------------------------|---------------------|-------------------|
|                      | Adenylyl cyclase (AC) activity, pmol cAMP/min/mg of membrane protein,<br>$M \pm SEM$ |                        |                     |                   |
| - TP4/2              | $19.0 \pm 1.3$                                                                       | $413.5 \pm 9.1^a$      | $184.1 \pm 5.6^a$   | $138.7 \pm 1.8^a$ |
| + TP4/2, $10^{-5}$ M | $18.3 \pm 0.8$                                                                       | $427.7 \pm 13.9^a$     | $176.2 \pm 7.3^a$   | $135.3 \pm 5.8^a$ |

Notes. <sup>a</sup> - the difference between the basal adenylyl cyclase activity and the forskolin-, GppNHp- and TSH-stimulated adenylyl cyclase activity is significant at  $p < 0.05$ . The data are presented as the  $M \pm SEM$ ,  $n=5$ .
