# Supplementary material for: Comparative Study of the Steroidogenic Effects of Human Chorionic Gonadotropin and Thieno[2,3-D]pyrimidine-Based Allosteric Agonist of Luteinizing Hormone Receptor in Young Adult, Aging and Diabetic Male Rats
Source: MDPI journal article supplement (doi:10.3390/ijms21207493), 2020-10-11
Supplement: s1 [file s1]

| Group                                                                        | 10-00      | 11-00       | 13-00        | 15-00        | AUC <sub>10.00-15.00</sub><br>(total) |
|------------------------------------------------------------------------------|------------|-------------|--------------|--------------|---------------------------------------|
| <b>TP4/2</b>                                                                 |            |             |              |              |                                       |
| <b>A) Intraperitoneal administration of TP4/2 at the doses of 5-50 mg/kg</b> |            |             |              |              |                                       |
| C+DMSO (i.p.)                                                                | 14.2 ± 2.2 | 18.7 ± 4.1  | 20.5 ± 2.1   | 19.5 ± 3.1   | 95 ± 14                               |
| C+TP, 5 mg/kg                                                                | 15.4 ± 3.0 | 25.5 ± 2.2  | 27.7 ± 2.7   | 28.0 ± 1.5   | 129 ± 8                               |
| C+TP, 10 mg/kg                                                               | 17.3 ± 2.3 | 27.7 ± 1.4  | 37.6 ± 3.2   | 38.8 ± 5.7   | 164 ± 13                              |
| C+TP, 15 mg/kg                                                               | 18.6 ± 2.4 | 34.5 ± 3.6  | 58.4 ± 5.6   | 60.2 ± 9.4   | 238 ± 23                              |
| C+TP, 25 mg/kg                                                               | 17.8 ± 4.1 | 41.0 ± 4.7  | 76.7 ± 8.9   | 77.6 ± 9.8   | 301 ± 18                              |
| C+TP, 50 mg/kg                                                               | 14.3 ± 2.6 | 42.6 ± 7.1  | 79.7 ± 4.0   | 76.3 ± 1.4   | 307 ± 15                              |
| <b>B) Subcutaneous administration of TP4/2 at the doses of 5-50 mg/kg</b>    |            |             |              |              |                                       |
| C+DMSO (s.c.)                                                                | 16.6 ± 2.9 | 16.5 ± 4.0  | 17.2 ± 2.4   | 14.9 ± 3.8   | 82 ± 16                               |
| C+TP, 5 mg/kg                                                                | 16.0 ± 3.9 | 15.2 ± 4.4  | 18.7 ± 3.9   | 17.2 ± 5.6   | 83 ± 19                               |
| C+TP, 10 mg/kg                                                               | 13.9 ± 3.2 | 14.9 ± 2.7  | 18.8 ± 5.1   | 22.5 ± 6.7   | 90 ± 21                               |
| C+TP, 15 mg/kg                                                               | 12.3 ± 3.4 | 14.9 ± 2.9  | 27.4 ± 6.0   | 29.5 ± 7.0   | 110 ± 22                              |
| C+TP, 25 mg/kg                                                               | 15.1 ± 3.6 | 18.5 ± 3.9  | 30.2 ± 8.1   | 30.5 ± 9.2   | 128 ± 26                              |
| C+TP, 50 mg/kg                                                               | 15.9 ± 3.9 | 20.6 ± 3.9  | 29.8 ± 5.1   | 29.2 ± 3.0   | 131 ± 15                              |
| <b>Human chorionic gonadotropin</b>                                          |            |             |              |              |                                       |
| <b>C) Intraperitoneal administration of hCG at the doses of 5-100 IU/rat</b> |            |             |              |              |                                       |
| C+saline (i.p.)                                                              | 17.7 ± 4.6 | 15.4 ± 3.1  | 18.1 ± 2.9   | 17.0 ± 2.7   | 85 ± 15                               |
| C-CG, 5 IU/rat                                                               | 12.8 ± 2.9 | 16.8 ± 2.7  | 49.0 ± 9.2   | 57.8 ± 9.6   | 189 ± 28                              |
| C-CG, 10 IU/rat                                                              | 12.9 ± 3.3 | 24.2 ± 4.9  | 75.8 ± 9.4   | 59.2 ± 8.1   | 254 ± 33                              |
| C-CG, 20 IU/rat                                                              | 12.6 ± 3.0 | 37.1 ± 7.0  | 78.0 ± 4.3   | 58.5 ± 9.6   | 279 ± 4                               |
| C-CG, 50 IU/rat                                                              | 13.3 ± 2.3 | 65.1 ± 7.4  | 102.8 ± 19.9 | 70.9 ± 6.9   | 381 ± 36                              |
| C-CG, 100 IU/rat                                                             | 13.6 ± 2.8 | 70.9 ± 16.5 | 79.3 ± 11.0  | 59.8 ± 9.8   | 333 ± 47                              |
| <b>D) Subcutaneous administration of hCG at the doses of 5-100 IU/rat</b>    |            |             |              |              |                                       |
| C+saline (s.c.)                                                              | 14.2 ± 2.2 | 18.7 ± 4.1  | 20.5 ± 2.1   | 19.5 ± 3.1   | 95 ± 14                               |
| C-CG, 5 IU/rat                                                               | 12.0 ± 2.4 | 25.7 ± 2.7  | 43.0 ± 6.6   | 42.4 ± 5.7   | 173 ± 22                              |
| C-CG, 10 IU/rat                                                              | 12.8 ± 2.6 | 43.8 ± 8.6  | 89.4 ± 11.7  | 73.7 ± 9.2   | 324 ± 46                              |
| C-CG, 20 IU/rat                                                              | 18.1 ± 5.2 | 71.5 ± 15.7 | 113.0 ± 12.5 | 94.1 ± 16.7  | 436 ± 63                              |
| C-CG, 50 IU/rat                                                              | 16.2 ± 1.6 | 76.2 ± 9.4  | 158.6 ± 14.6 | 118.5 ± 15.2 | 558 ± 33                              |
| C-CG, 100 IU/rat                                                             | 12.6 ± 2.1 | 81.4 ± 4.1  | 167.1 ± 10.9 | 111.4 ± 18.9 | 574 ± 35                              |

*Note.* The drugs or saline or DMSO were administered at 10.00.  $n=3$ .
