# Supplementary material for: Comparative Study of the Steroidogenic Effects of Human Chorionic Gonadotropin and Thieno[2,3-D]pyrimidine-Based Allosteric Agonist of Luteinizing Hormone Receptor in Young Adult, Aging and Diabetic Male Rats
Source: Int J Mol Sci. 2020 Oct 11;21(20):7493. doi: 10.3390/ijms21207493 (PMC7590010; doi:10.3390/ijms21207493)
Supplement: Supplementary file 1 [file ijms-21-07493-s001.zip]

Archive with 10 entries (10 files):
- Supplementary files/Fig. S1 r1.pdf
- Supplementary files/Fig. S2 r1.pdf
- Supplementary files/Fig. S3 r1.pdf
- Supplementary files/Fig. S4 r1.pdf
- Supplementary files/Fig. S5 r1.pdf
- Supplementary files/Table S1 r1.pdf
- Supplementary files/Table S2 r1.pdf
- Supplementary files/Table S3 r1.pdf
- Supplementary files/Table S4 r1.pdf
- Supplementary files/Table S5 r1.pdf
