# Supplementary figures and images for: Comparative Study of the Steroidogenic Effects of Human Chorionic Gonadotropin and Thieno[2,3-D]pyrimidine-Based Allosteric Agonist of Luteinizing Hormone Receptor in Young Adult, Aging and Diabetic Male Rats
Source: MDPI journal article supplement (doi:10.3390/ijms21207493), 2020-10-11

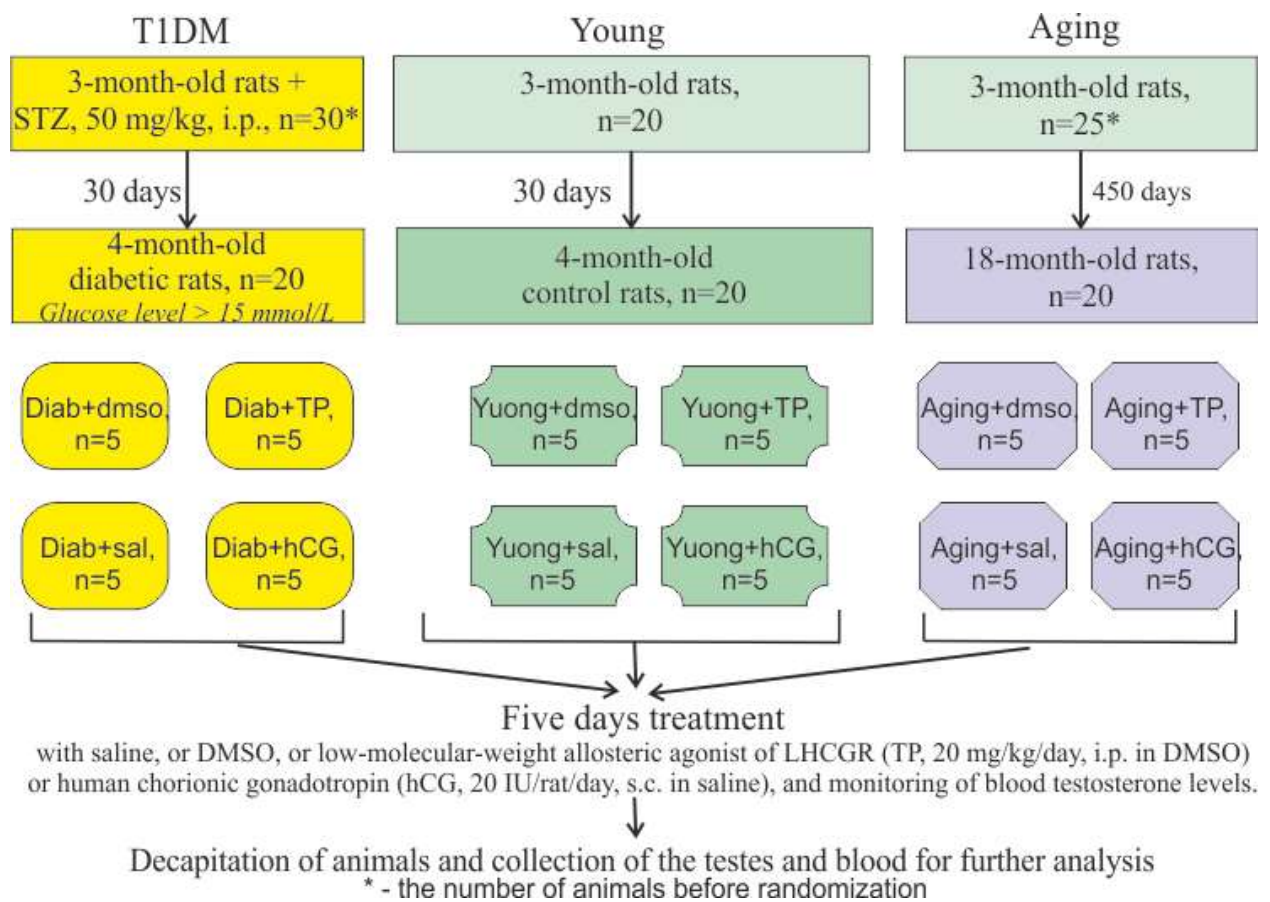

Supplement: s1 [file s1]

**A**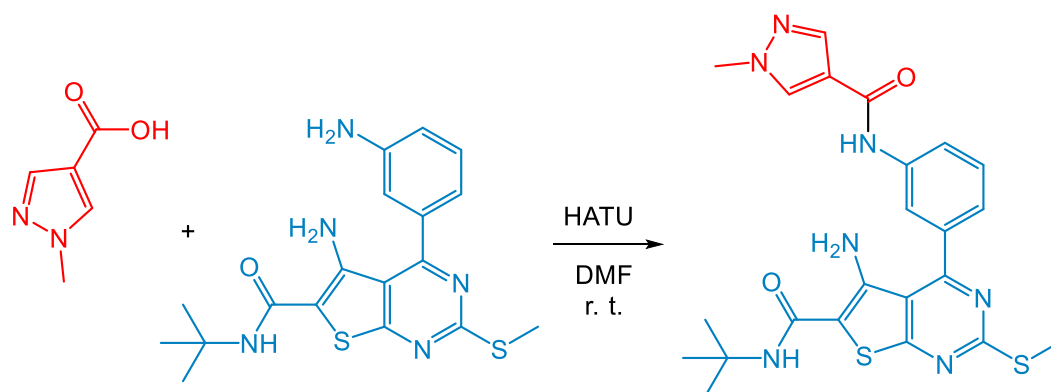**B**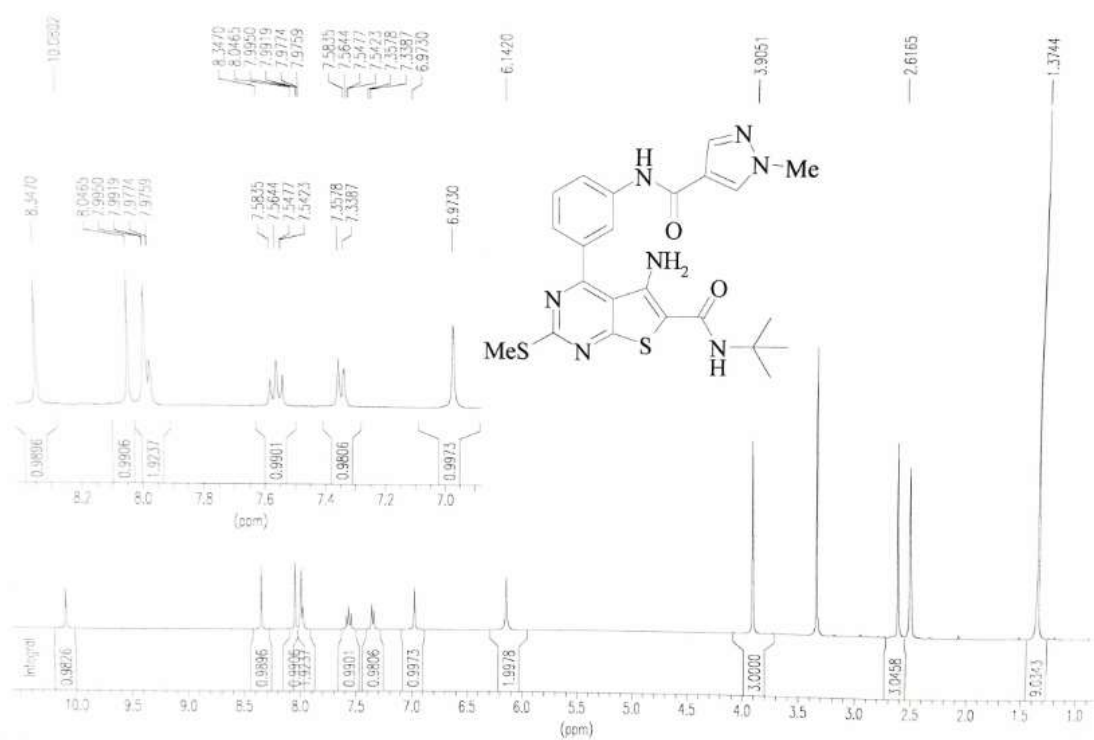**C**

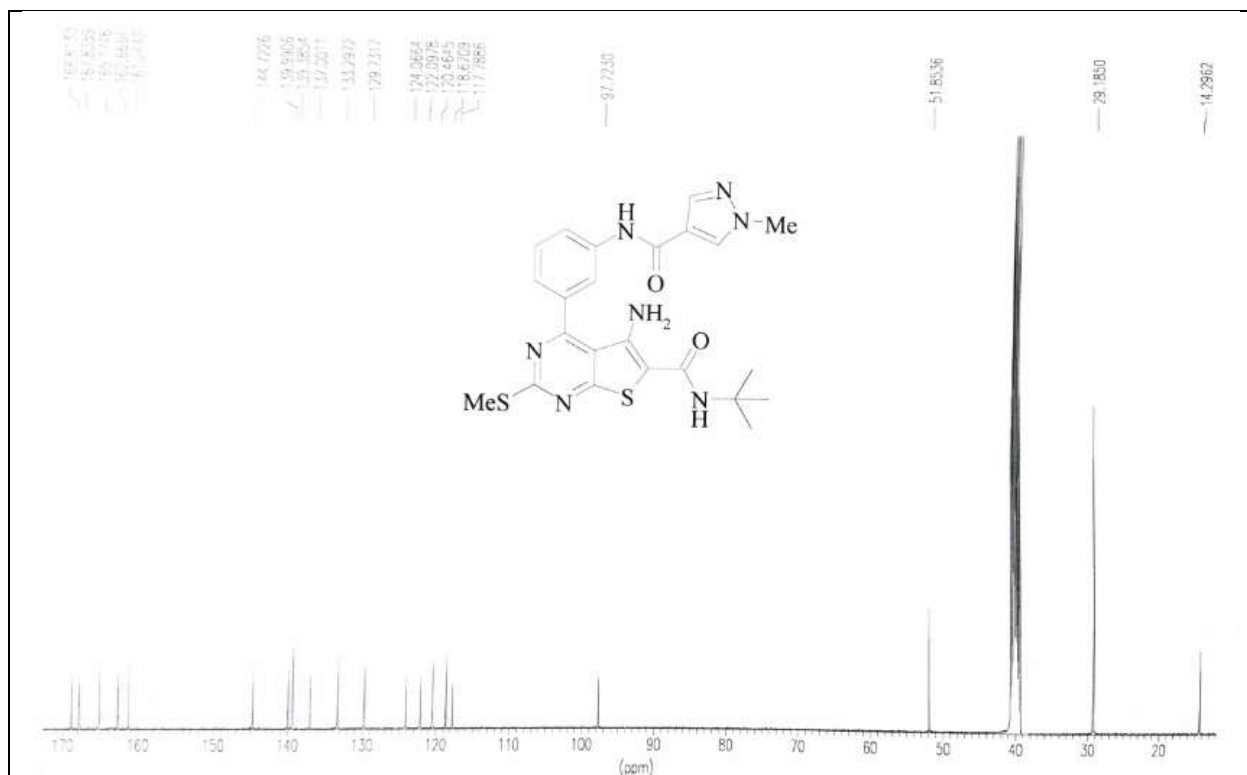

Supplement: s1 [file s1]
